# Mitigating Microvascular Leak during Fluid Resuscitation of Hemorrhagic Shock

Keith R. Walley, M.D.

**A**LTHOUGH it is obvious that some fluid resuscitation of hypovolemic shock is required to increase intravascular volume and deliver oxygen to vital organs, it is also becoming clear that excessive fluid resuscitation has adverse consequences.<sup>1</sup> In the urgent clinical setting, determining the optimum volume of fluid resuscitation is nontrivial. Timing and clinical context are also important. Therefore, any adjunctive strategies that increase safety and decrease apparent need for large-volume fluid resuscitation would be extremely helpful. In this issue of *ANESTHESIOLOGY*, Trieu *et al.*<sup>2</sup> take some promising first steps in an animal model of hemorrhagic hypovolemic shock.

The plumber's goal of fluid resuscitation is to prime the pump to increase pump output—increase intravascular volume to increase ventricular diastolic filling so that cardiac output is increased *via* the Frank-Starling relationship. This is the “macrovascular” component of fluid resuscitation. However, the capillary microcirculation, where the vast majority of oxygen and metabolite exchange occurs, is also involved, particularly in hemorrhagic and septic shock. Normal homogeneous microvascular flow becomes heterogeneous with stopped flow in some capillaries and excessively high shunt flow in others, so that gas and metabolite exchange is impaired.<sup>3</sup> Adhesion of activated leukocytes to activated microvascular endothelium contributes to stopped flow and impaired microcirculatory function. The duration and extent of hypovolemia both factor into this “no reflow” phenomenon observed in hemorrhagic shock.<sup>4</sup> When severe, the degree of microvascular dysfunction observed in sterile hemorrhagic/hypovolemic shock likely can be as severe as microvascular dysfunction observed in septic shock. Accordingly, resuscitated severe hemorrhagic shock patients often display distributive shock features. Early rapid fluid resuscitation improves microvascular flow, improves oxygen transport to the tissues, and improves organ function.<sup>5</sup> Thus, fluid resuscitation sufficient to improve microvascular function is essential.

Too much fluid delivered to a relatively leaky microcirculation results in tissue edema, increased diffusion distances

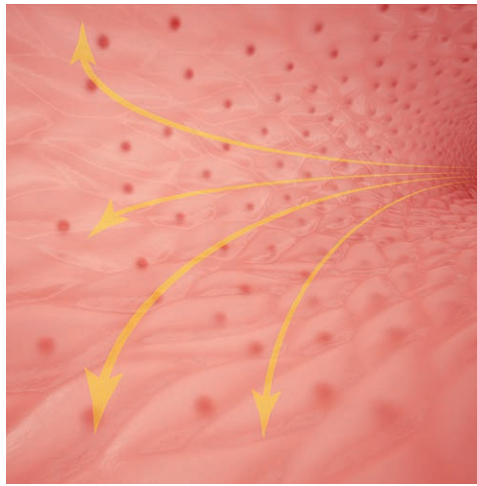

***“[T]he endothelium is a promising target for intervention in clinical shock...”***

for gases and metabolites, and increased tissue hydrostatic pressure, which compresses the microcirculation, compounding the microcirculatory problem. In septic shock patients, where microvascular dysfunction is particularly prominent, fluid resuscitation that increases central venous pressure more than 12 mmHg (typically exceeding ~5 l of crystalloid resuscitation) is associated with significantly increased 28-day mortality.<sup>1</sup> Although very early aggressive resuscitation is likely beneficial, fluid resuscitation is often continued for too long so that it is not uncommon for more than 10 l of crystalloid and colloid to be administered in the first 24 h. In most patients, the emerging evidence suggests this is detrimental.

Tie2 expressed on vascular endothelium is a receptor for angiotensin-1 and -2 and plays a central role in maintaining normal microvascular function and permeability, in particular.<sup>6</sup> Angiotensin-1 ligation of Tie2 on endothelial cells signals downstream resulting in reduced expression of inflammatory cell adhesion molecules and reduced permeability of intercellular junctions. Thus, angiotensin-1 signaling *via* Tie2 reduces endothelial activation and helps maintain microvascular function. This is particularly important when conditions such as hemorrhagic or septic shock inflame microvascular endothelium.<sup>7</sup> Interestingly, angiotensin-2 acts as an endogenous competitive inhibitor of angiotensin-1 and, therefore, has the opposite effect. Angiotensin-2 is increased in trauma patients and is associated with adverse outcomes.<sup>8</sup>

Trieu *et al.* contribute to our understanding by finding that vasculotide, an angiotensin-1 mimetic, protects against microvascular injury during resuscitation of experimental hemorrhagic shock.<sup>2</sup> Hemorrhagic shock resulted in a decrease in continuously perfused capillaries and, hence, an increase in the number of nonperfused capillaries. These nonperfused capillaries were not reopened by fluid resuscitation with crystalloid and blood. However, if vasculotide had been added prior to the induction of hemorrhagic shock or, importantly, soon after initiation of fluid resuscitation,

Image: © ThinkStock.

Corresponding article on page 361.

Accepted for publication October 19, 2017. From the Centre for Heart Lung Innovation, University of British Columbia, Vancouver, British Columbia, Canada.

Copyright © 2018, the American Society of Anesthesiologists, Inc. Wolters Kluwer Health, Inc. All Rights Reserved. *Anesthesiology* 2018; 128:252-3

previously nonperfused capillaries were recruited by fluid resuscitation. Measures of microvascular function also were improved by vasculotide. Microvascular leak was decreased by vasculotide pretreatment so that the volume of fluid resuscitation required to restore mean arterial pressure was less with vasculotide pretreatment. Additional biochemical measures shed light on contributing mechanisms. Resuscitation of hemorrhagic shock expectedly increased microvascular inflammation as indicated by several upregulated inflammatory mediators relevant to the microvasculature. Vasculotide reduced circulating angiotensin-2 levels; angiotensin-2 being known to increase vascular inflammation and permeability.

These exciting results, together with recent related studies,<sup>9,10</sup> suggest that the endothelium is a promising target for intervention in clinical shock states. The endothelium and microvasculature play a very prominent role in subsequent organ dysfunction. Mitigating endothelial activation, induced by inflammatory stimuli that are a part of hypovolemic shock states, represents a rationale hypothesis aimed at preventing or diminishing the organ dysfunction and death that result from severe microvascular dysfunction.

### Research Support

Supported by Canadian Institutes of Health Research Foundation (Ottawa, Ontario, Canada) grant No. FDN-154311.

### Competing Interests

The author is not supported by, nor maintains any financial interest in, any commercial activity that may be associated with the topic of this article.

### Correspondence

Address correspondence to Dr. Walley: Keith.Walley@hli.ubc.ca

### References

1. Boyd JH, Forbes J, Nakada TA, Walley KR, Russell JA: Fluid resuscitation in septic shock: A positive fluid balance and elevated central venous pressure are associated with increased mortality. *Crit Care Med* 2011; 39:259–65
2. Trieu M, van Meurs M, van Leeuwen ALI, Van Slyke P, Hoang V, Geeraedts LMG, Boer C, van den Brom CE: Vasculotide, an angiotensin-1 mimetic, restores microcirculatory perfusion and microvascular leakage and decreases fluid resuscitation requirements in hemorrhagic shock. *ANESTHESIOLOGY* 2018; 128:361–74
3. Bateman RM, Walley KR: Microvascular resuscitation as a therapeutic goal in severe sepsis. *Crit Care* 2005; 9 Suppl 4:S27–32
4. Barroso-Aranda J, Schmid-Schönbein GW, Zweifach BW, Engler RL: Granulocytes and no-reflow phenomenon in irreversible hemorrhagic shock. *Circ Res* 1988; 63:437–47
5. Anning PB, Sair M, Winlove CP, Evans TW: Abnormal tissue oxygenation and cardiovascular changes in endotoxemia. *Am J Respir Crit Care Med* 1999; 159:1710–5
6. Thurston G, Suri C, Smith K, McClain J, Sato TN, Yancopoulos GD, McDonald DM: Leakage-resistant blood vessels in mice transgenically overexpressing angiotensin-1. *Science* 1999; 286:2511–4
7. Han S, Lee SJ, Kim KE, Lee HS, Oh N, Park I, Ko E, Oh SJ, Lee YS, Kim D, Lee S, Lee DH, Lee KH, Chae SY, Lee JH, Kim SJ, Kim HC, Kim S, Kim SH, Kim C, Nakaoka Y, He Y, Augustin HG, Hu J, Song PH, Kim YI, Kim P, Kim I, Koh GY: Amelioration of sepsis by TIE2 activation-induced vascular protection. *Sci Transl Med* 2016; 8:335ra55
8. Ganter MT, Cohen MJ, Brohi K, Chesebro BB, Staudenmayer KL, Rahn P, Christiaans SC, Bir ND, Pittet JF: Angiotensin-2, marker and mediator of endothelial activation with prognostic significance early after trauma? *Ann Surg* 2008; 247:320–6
9. Ghosh CC, David S, Zhang R, Berghelli A, Milam K, Higgins SJ, Hunter J, Mukherjee A, Wei Y, Tran M, Suber F, Kobzik L, Kain KC, Lu S, Santel A, Yano K, Guha P, Dumont DJ, Christiani DC, Parikh SM: Gene control of tyrosine kinase TIE2 and vascular manifestations of infections. *Proc Natl Acad Sci USA* 2016; 113:2472–7
10. Kumpers P, Gueler F, David S, Slyke PV, Dumont DJ, Park JK, Bockmeyer CL, Parikh SM, Pavenstadt H, Haller H, Shushakova N: The synthetic tie2 agonist peptide vasculotide protects against vascular leakage and reduces mortality in murine abdominal sepsis. *Crit Care* 2011; 15:R261
